# Supplementary material
Source: MDPI journal article supplement (https://www.mdpi.com/2072-4292/15/19/4775)
Supplement: s1 [file s1]

Archive with 5 entries (5 files):
- Addition  S1.pdf
- Addition  S2.pdf
- Addition  S3.pdf
- Addition  S4.pdf
- Addition  S5.pdf
