# Supplementary material
Source: MDPI journal article supplement (https://www.mdpi.com/2072-4292/15/19/4775)
Supplement: s1 [file s1 › Addition S3.pdf]

The Addition S3.

**To Section 4.2. Bezymianny volcano activity in 2015-2022**

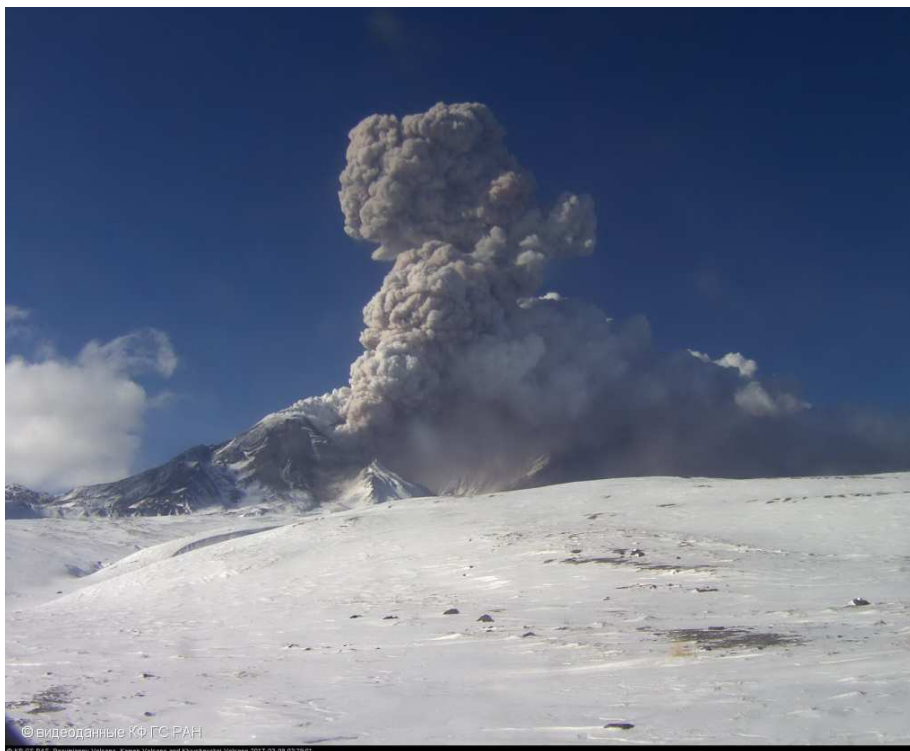

Figure S34. The explosive eruption of the Bezymianny volcano on March 09, 2017. Video data by KBGS RAS (<https://kam.emsd.ru/>) (<http://www.kscnet.ru/ivs/kvert/imgs/2232.jpg>)

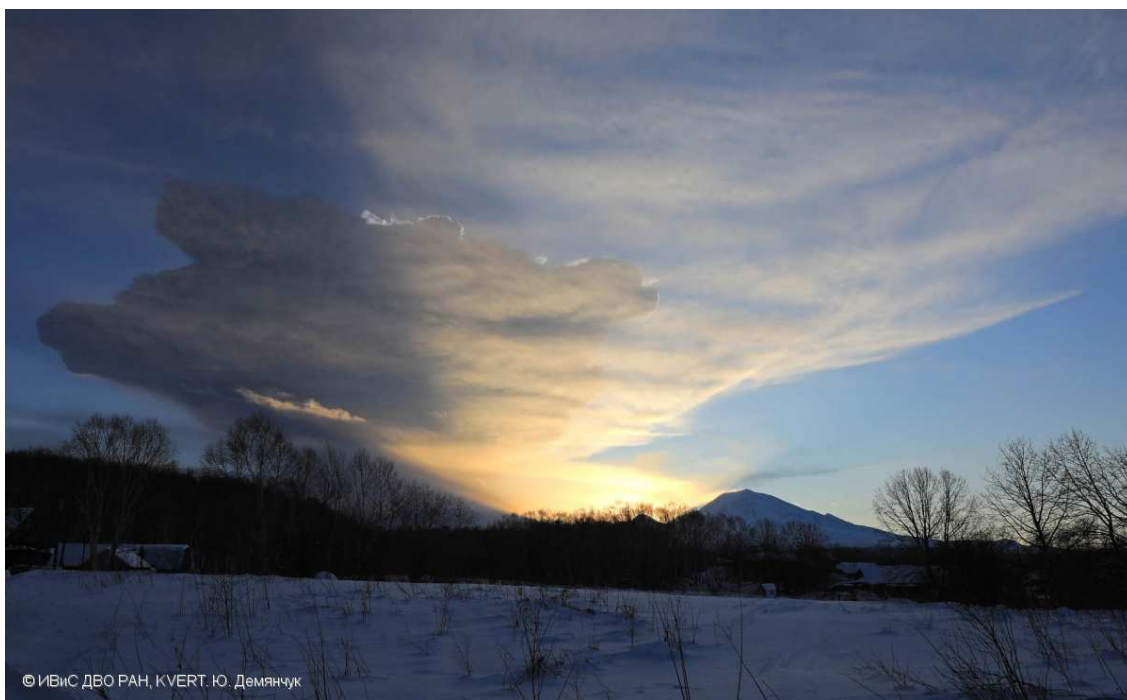

Figure S35. The explosions of the Bezymianny volcano sent ash up to 15 km a.s.l. on December 20, 2017. Photo by Yu. Demyanchuk (<http://www.kscnet.ru/ivs/kvert/imgs/2336.jpg>)

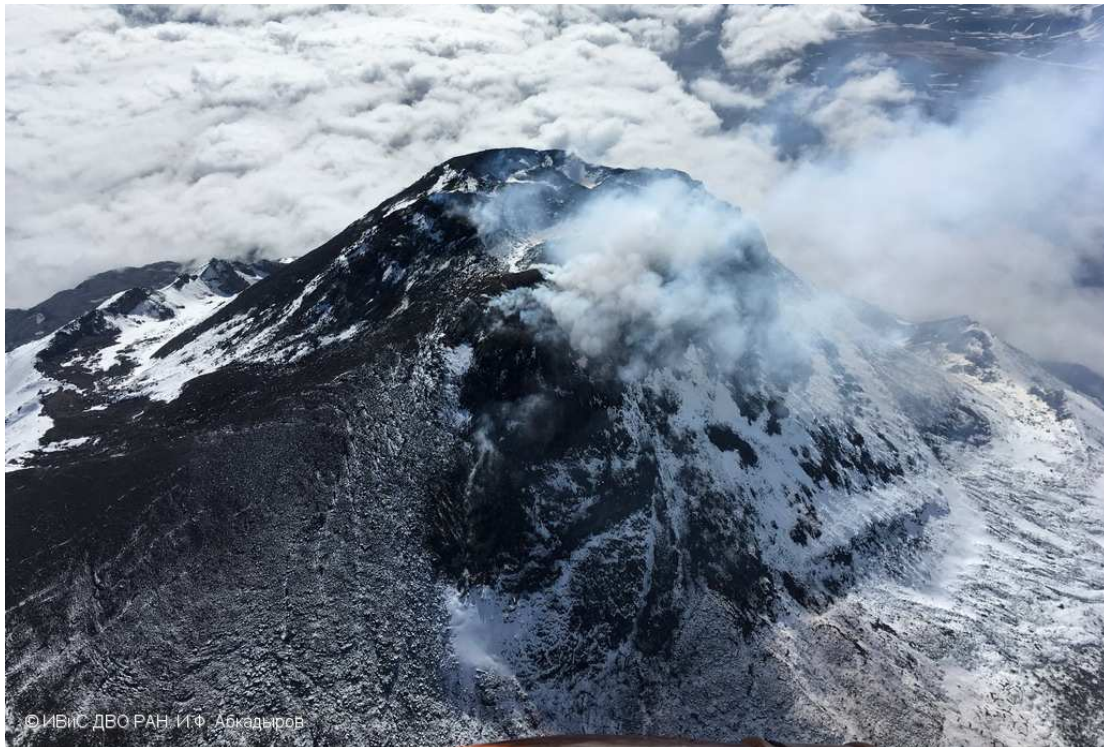

Figure S36. A lava flow is squeezing onto the northwestern slope of the Bezymianny dome on July 09, 2018. Photo by I. Abkadyrov (<http://www.kscnet.ru/ivs/kvert/imgs/2373.jpg>)

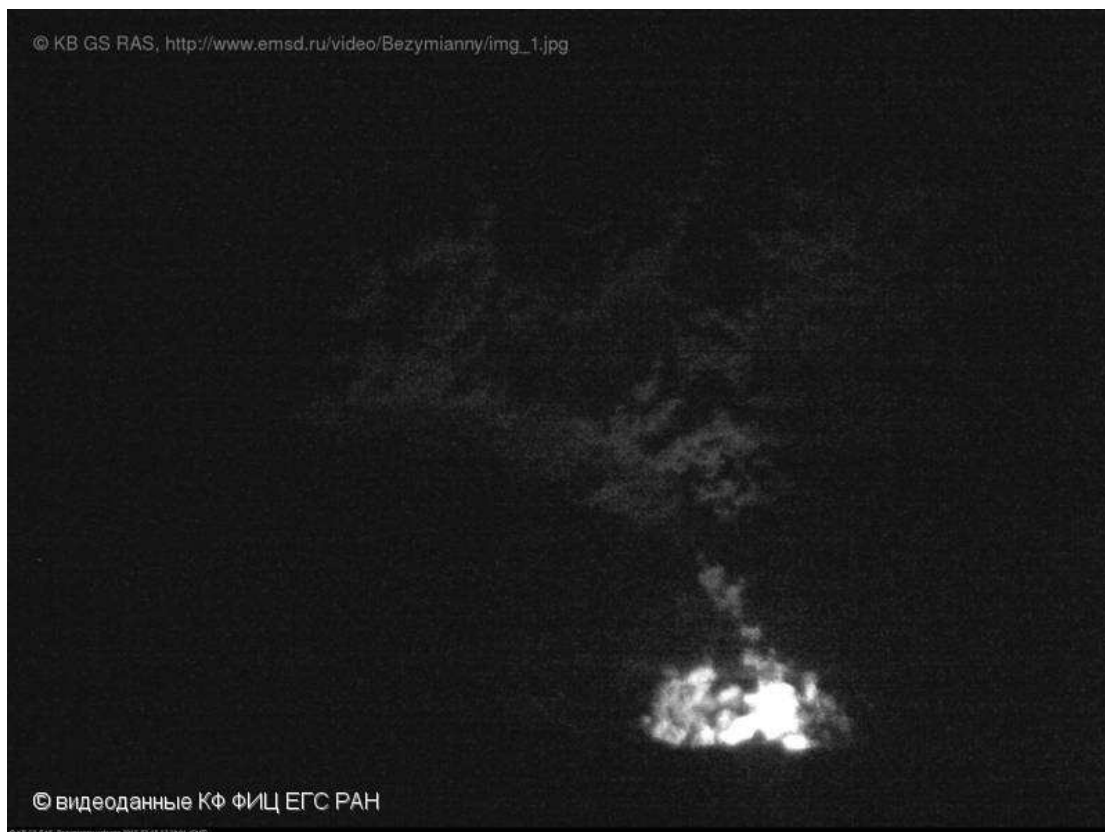

Figure S37. The explosions send ash up to 15 km a.s.l. on March 15, 2019. Hot fragments of rocks (white color) collapse on the lava dome slopes of the Bezymianny volcano. Video data by KBGS RAS (<https://kam.emsd.ru/>) (<http://www.kscnet.ru/ivs/kvert/imgs/2413.jpg>)

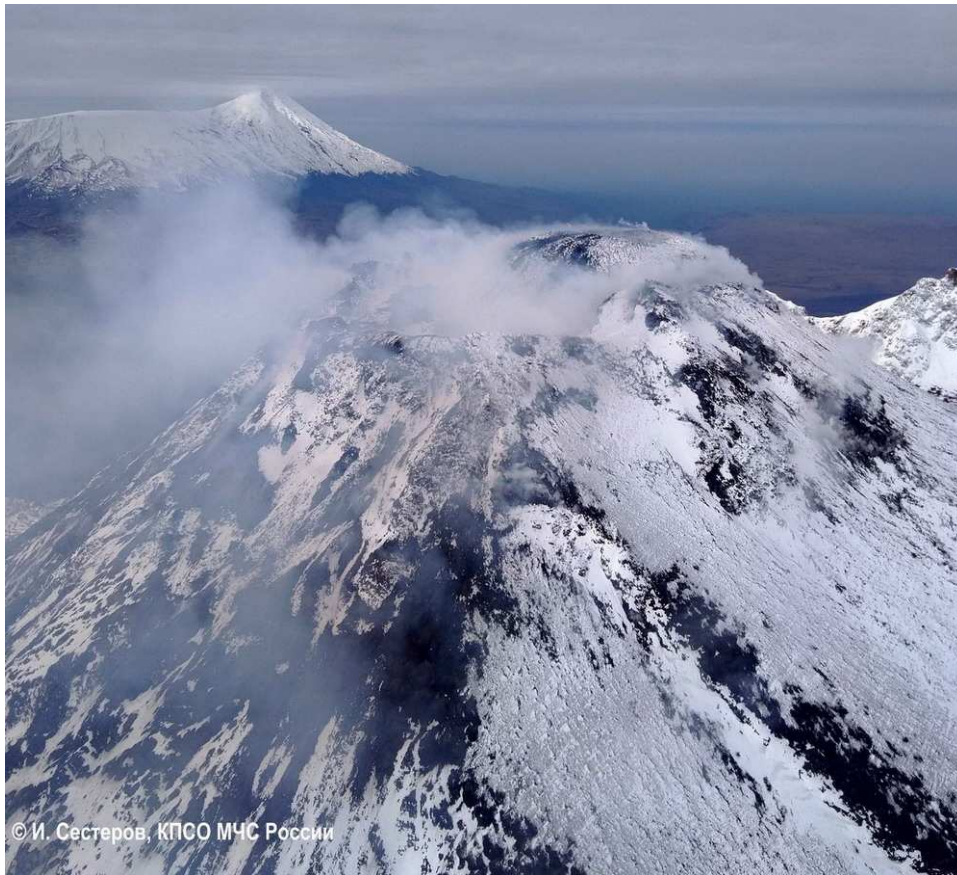

Figure S38. A new lava block is growing in the Bezymianny dome crater. Photo by I. Sesterov on August 26, 2020 (<http://www.kscnet.ru/ivs/kvert/imgs/2566.jpg>)

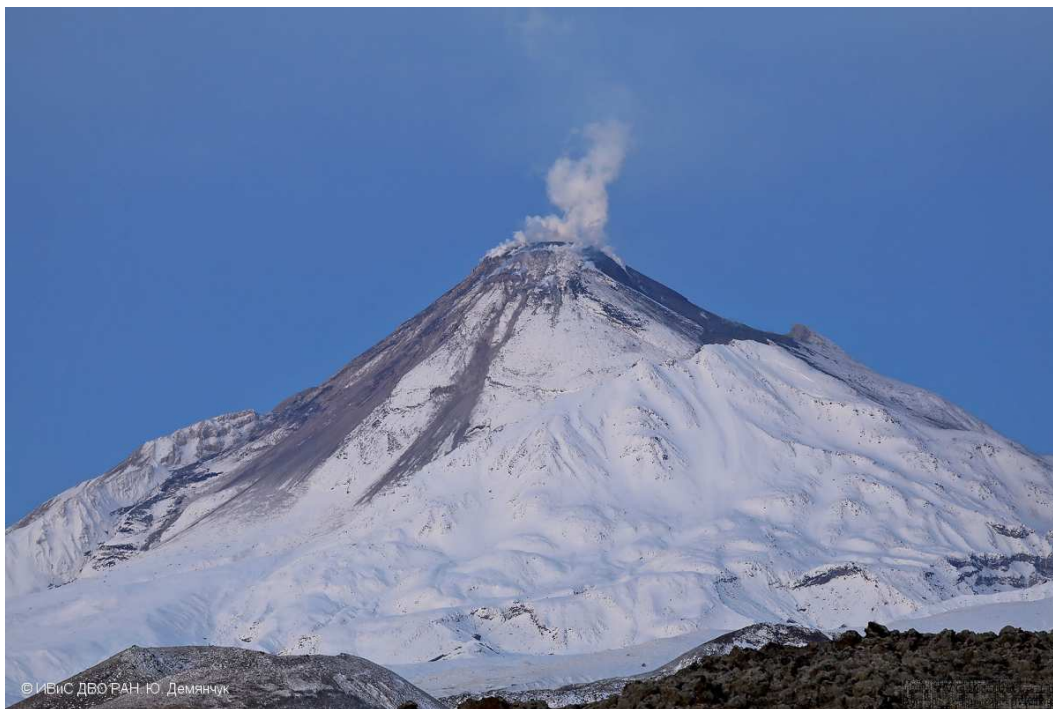

Figure S39. The lava flow is squeezing out onto the northern flank of the Bezymianny lava dome, hot avalanches collapse on the eastern its slopes. Photo by Yu. Demyanchuk on October 24, 2020 (<http://www.kscnet.ru/ivs/kvert/imgs/2619.jpg>)

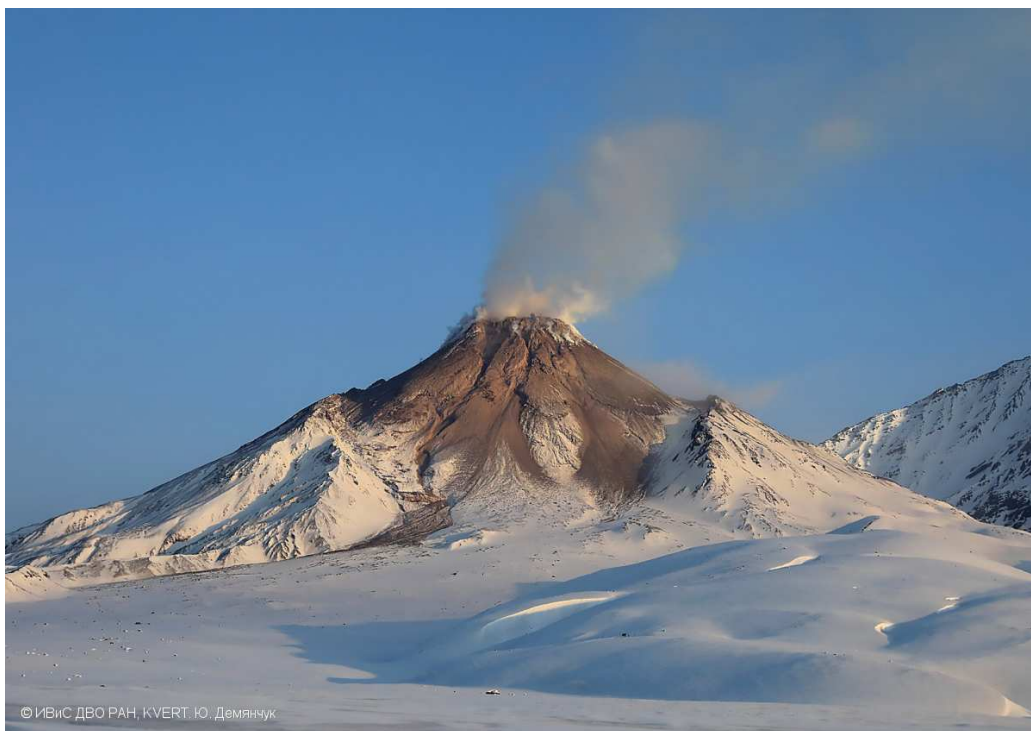

Figure S40. Activity of the Bezymianny volcano on April 20, 2022. Photo by Yu. Demyanchuk (<http://www.kscnet.ru/ivs/kvert/imgs/2772.jpg>)

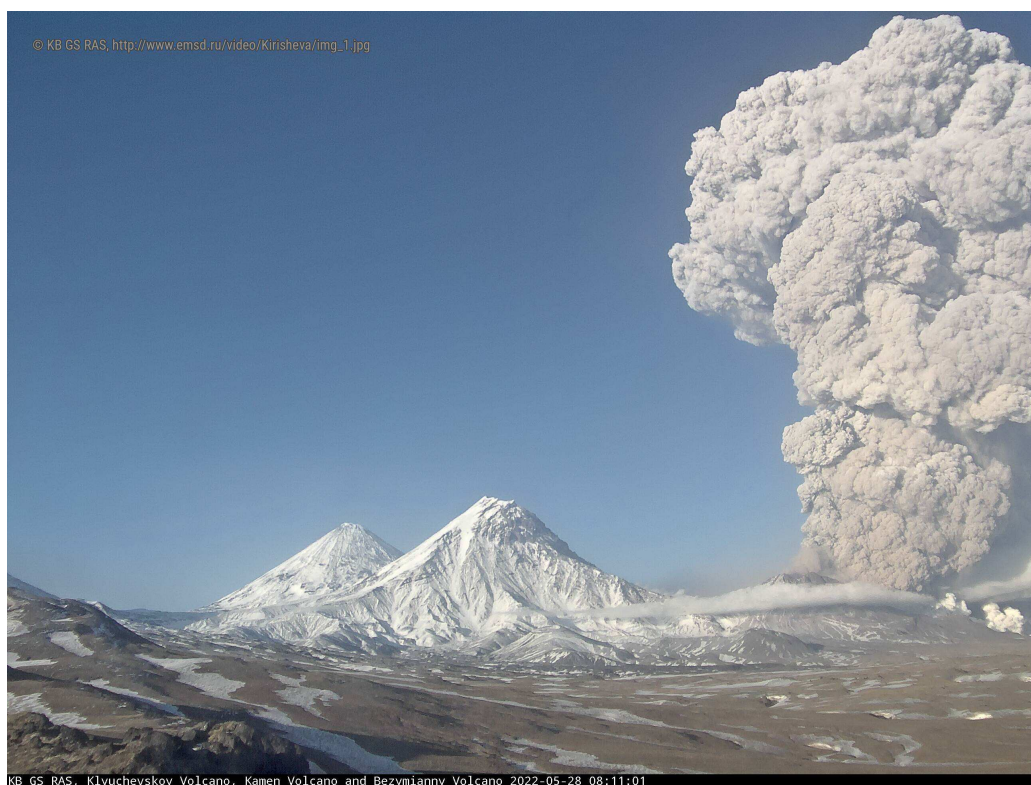

Figure S41. The strong explosive eruption of the Bezymianny volcano on May 28, 2022. Video data by KBGS RAS (<https://kam.emsd.ru/>)

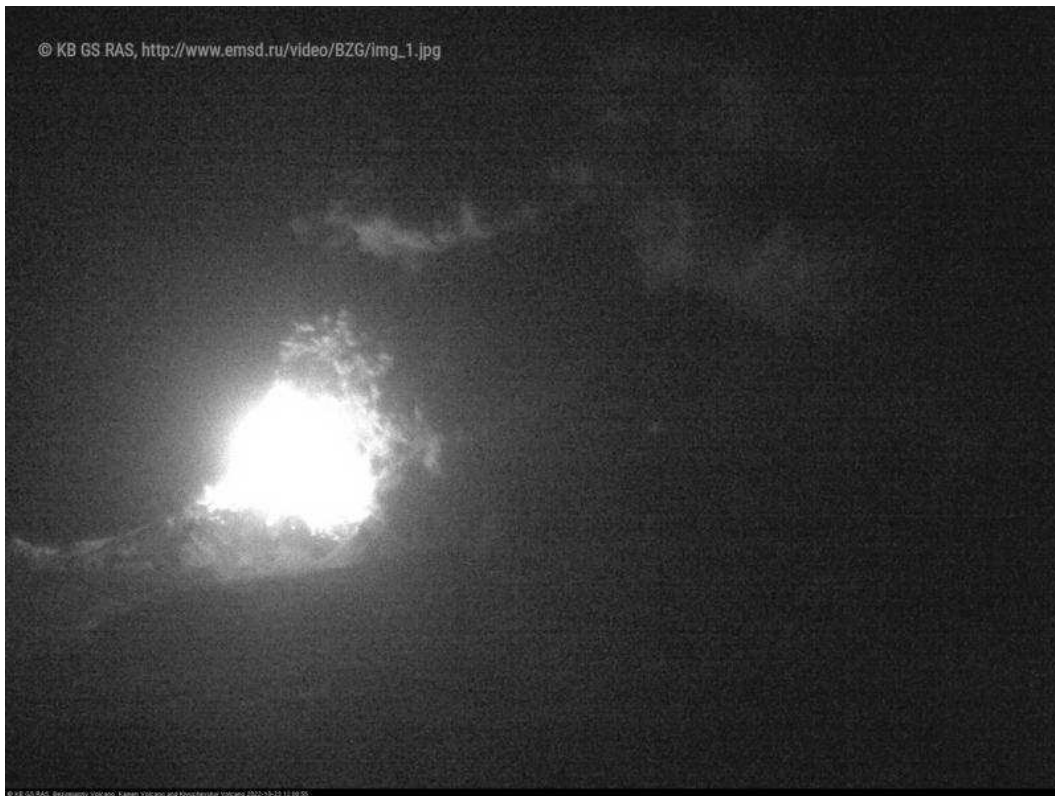

Figure S42. The strong explosive eruption of the Bezymianny volcano on October 23, 2022. Video data by KBGS RAS (<https://kam.emsd.ru/>)
