# Supplementary material
Source: MDPI journal article supplement (https://www.mdpi.com/2072-4292/15/19/4775)
Supplement: s1 [file s1 › Addition S5.pdf]

The Addition S5.

**To Section 4.4. Karymsky volcano activity in 2015-2022**

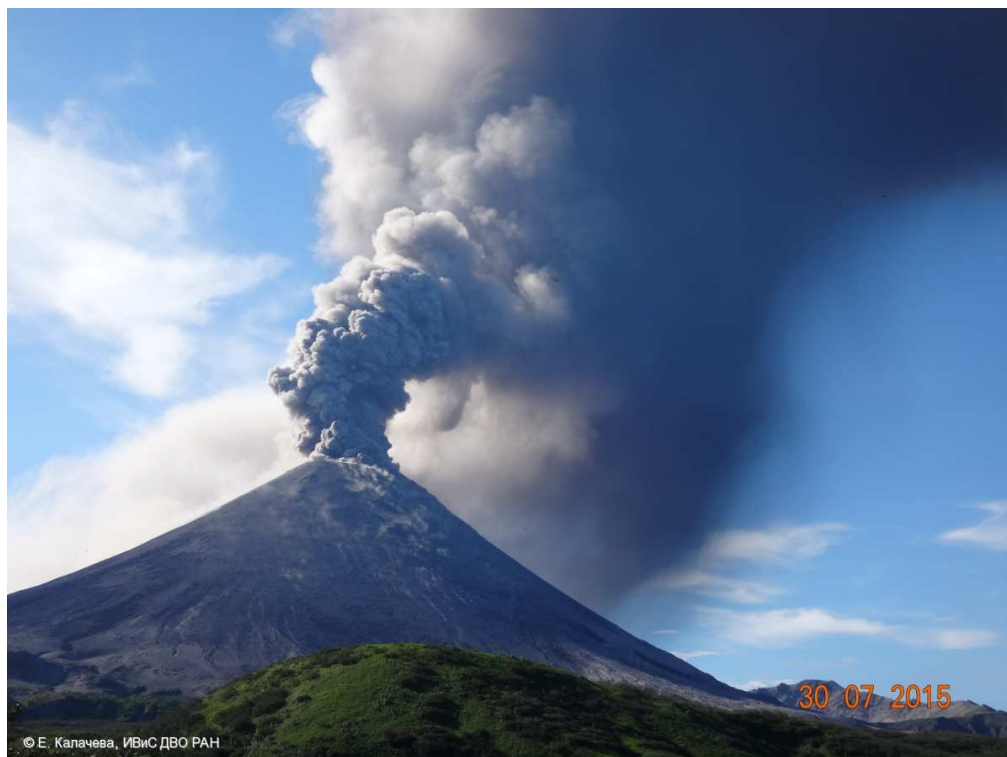

Figure S65. The explosive activity of the Karymsky volcano on July 30, 2015. Photo by E. Kalacheva (<http://www.kscnet.ru/ivs/kvert/imgs/2096.jpg>)

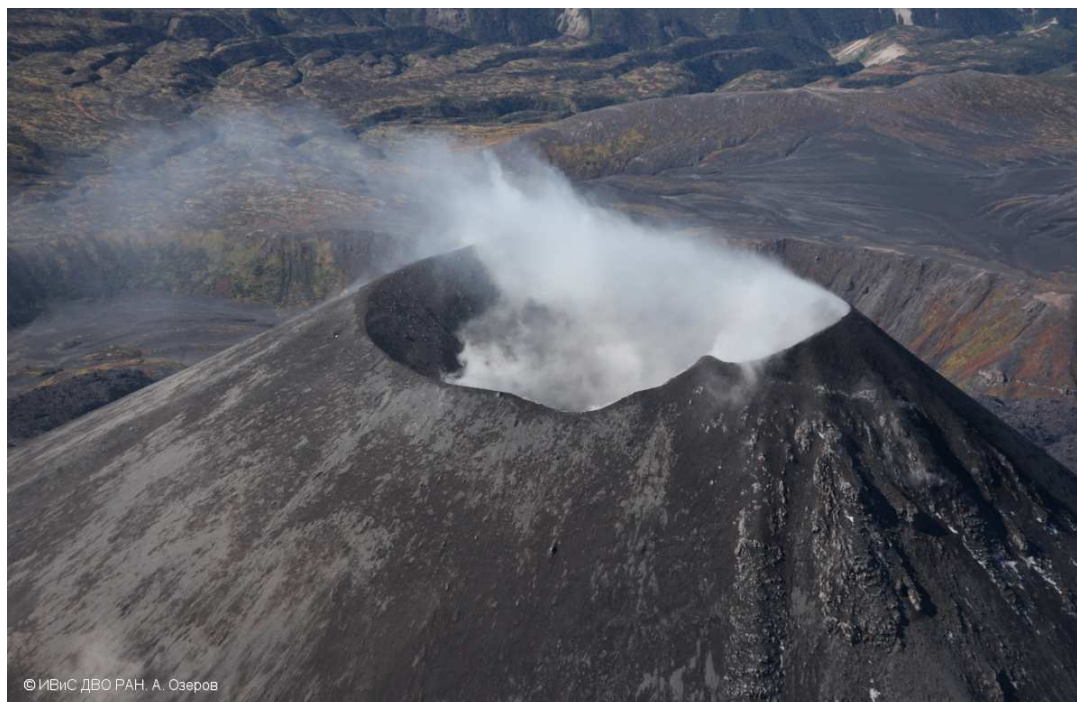

Figure S66. A gas-steam activity of the Karymsky volcano on September 14, 2016. Photo by A. Ozerov (<http://www.kscnet.ru/ivs/kvert/imgs/2204.jpg>)

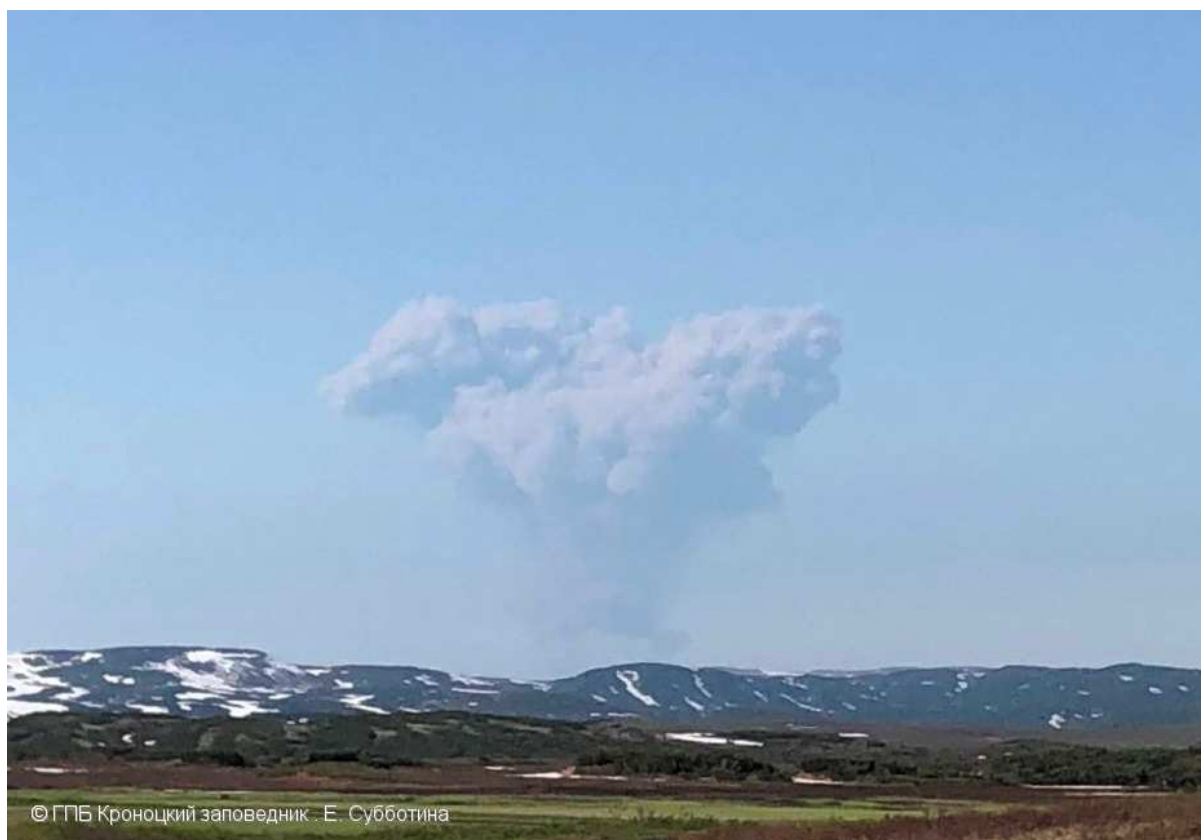

Figure S67. The explosive eruption of the Karymsky volcano at 21:10 UTC on July 14, 2018. View from Uzon caldera. Photo by E. Subbotina, Kronotsky Reserve (<http://www.kscnet.ru/ivs/kvert/imgs/2372.jpg>)

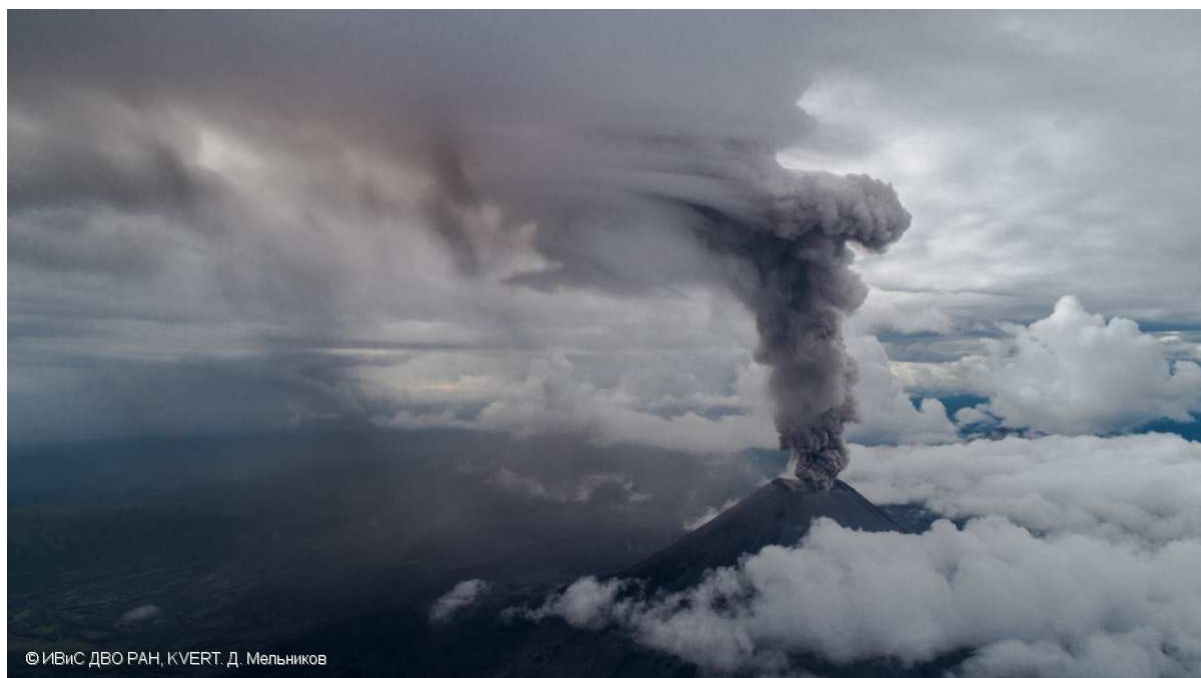

Figure S68. The explosive activity of the Karymsky volcano on August 14, 2019. Photo by D. Melnikov (<http://www.kscnet.ru/ivs/kvert/imgs/2489.jpg>)

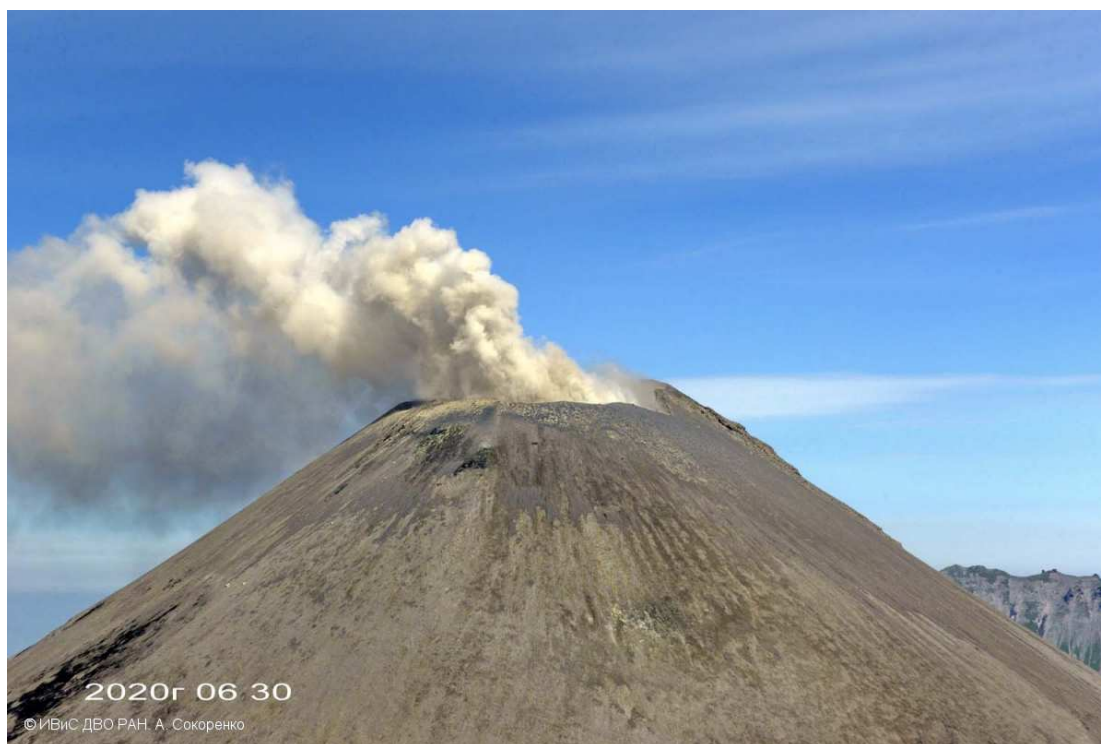

Figure S69. The gas-steam plume containing some amount of ash of the Karymsky volcano on June 30, 2020. Photo by A. Sokorenko (<http://www.kscnet.ru/ivs/kvert/imgs/2557.jpg>)

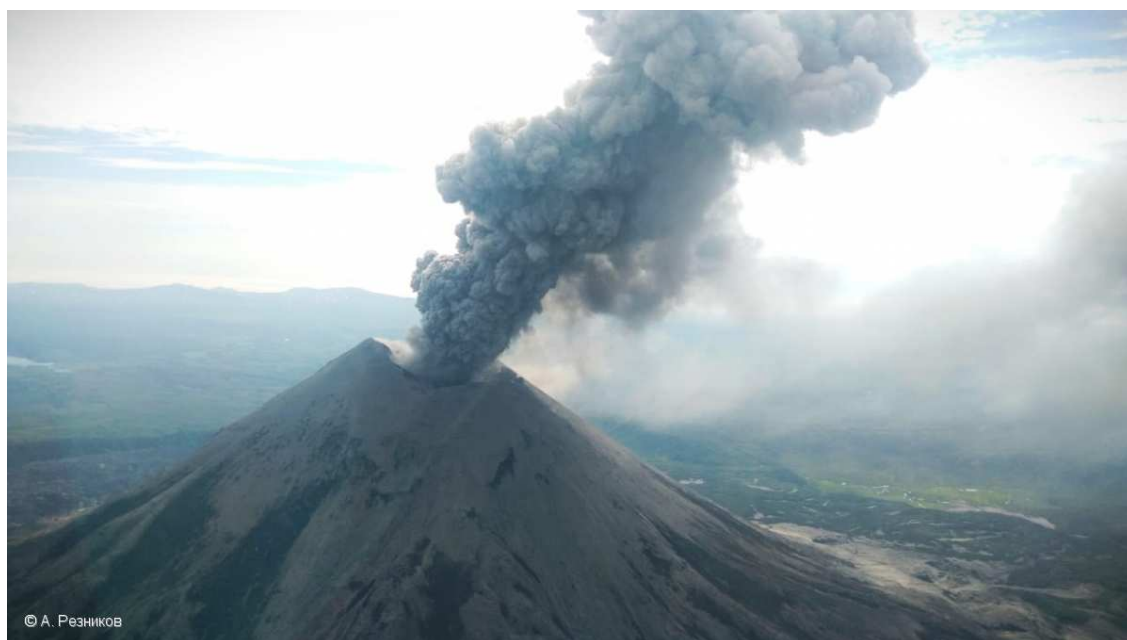

Figure S70. The explosive eruption of the Karymsky volcano on July 09, 2021. Photo by A. Reznikov (<http://www.kscnet.ru/ivs/kvert/imgs/2698.jpg>)

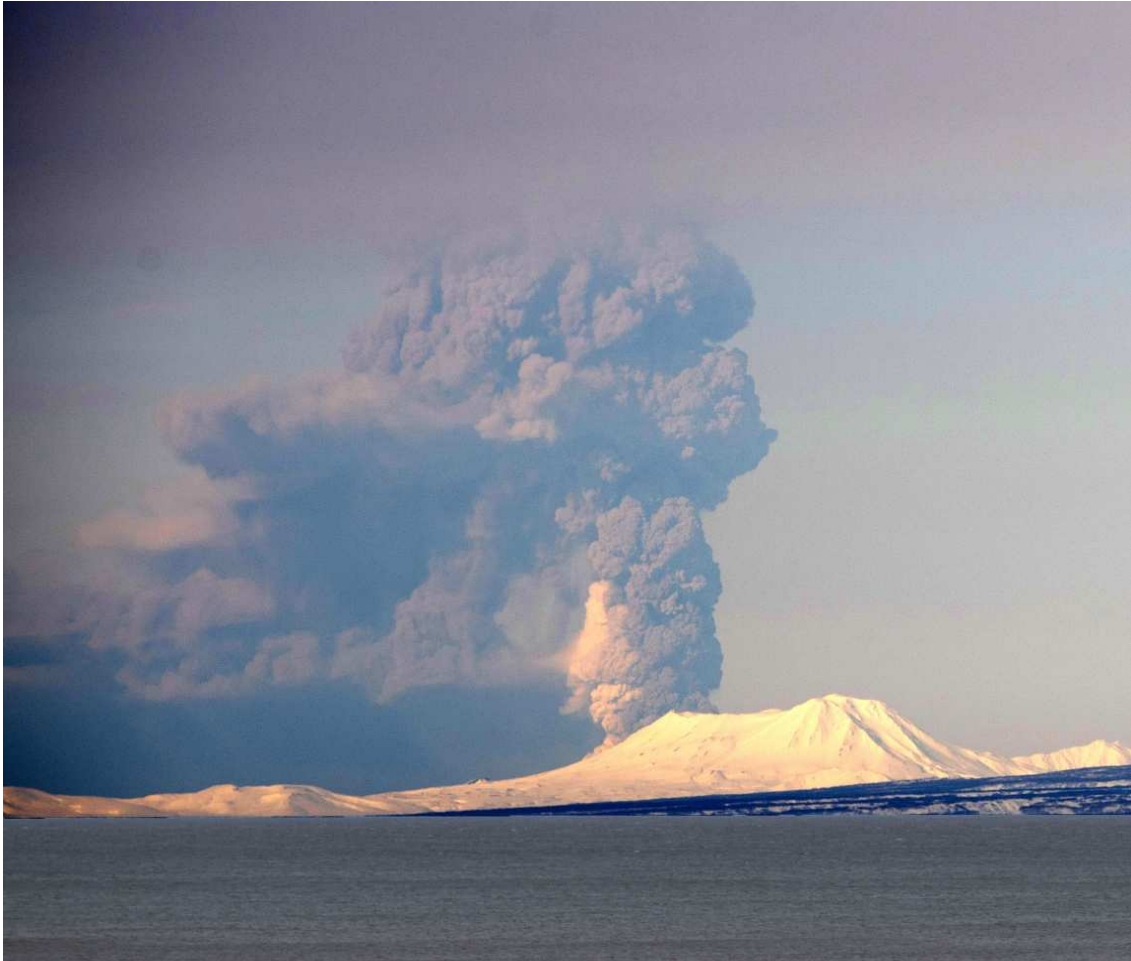

Figure S71. Ash removal from the Karymsky volcano up to 10 km a.s.l. on April 19, 2022. Photo by A. Eliseeva. View from the Olga Bay territory, the Kronotsky Bay. Maly Semyachik volcano is in the foreground (<http://www.kscnet.ru/ivs/kvert/imgs/2769.jpg>)
